# Supplementary material
Source: PubMed Central journal article supplement (PMC122061)
Supplement: 1471-2288-2-10-S1.pdf [file 1471-2288-2-10-S1.pdf]

| Table 1. Protocol Items for Meta-Analysis compared to Record Review -- Part 1                          |                                                                                                                                       |                                                                                                                                                                                     |
|--------------------------------------------------------------------------------------------------------|---------------------------------------------------------------------------------------------------------------------------------------|-------------------------------------------------------------------------------------------------------------------------------------------------------------------------------------|
|                                                                                                        | Record Review                                                                                                                         | Meta-analysis                                                                                                                                                                       |
| <u>Study Objectives</u>                                                                                | Identify treatments/exposures and outcomes to be studied<br><br>Define major and secondary hypotheses to be tested                    | Identify treatments/exposures and outcomes to be studied<br><br>Define effects to be estimated and whether focus is on estimating effect, explaining variability of results or both |
| <u>Study Population</u><br>Observational Unit<br><br>Inclusion/exclusion Criteria<br><br>Randomization | Subject<br><br>Prespecified characteristics of subjects<br><br>Not Applicable                                                         | Study<br><br>Prespecified characteristics of studies such as design, population, treatment<br><br>Determine whether limited to randomized studies or not                            |
| <u>Identification/Locating Subjects</u>                                                                | All or a random sample of all subjects with the condition of interest                                                                 | Attempt to find <u>all</u> studies of the condition and treatment of interest                                                                                                       |
| <u>Screening and Evaluation</u><br>Evaluation<br><br>Blinding                                          | Informed consent needed, physical examination and tests<br><br>Raters should be blinded to exposure or outcome                        | Quality of information about the study<br><br>Reviewers should be blinded to identity of study investigators and either methods or results                                          |
| <u>Data Collection</u><br>Method<br><br>Outcome Data Collected                                         | Systematically measured on individual subjects, as specified in the study protocol<br><br>Same outcome data collected on all subjects | Systematically abstract results from individual studies as specified in the protocol<br><br>Various outcome measures available in different studies                                 |
| <u>Data Analysis</u>                                                                                   | Standard methods for analysis of individual variables                                                                                 | Special methods for meta-analysis                                                                                                                                                   |

Table 1. Protocol Items for Meta-Analysis compared to Record Review -- Part 2

|                                            |                                                                                                                                                                                                                                                                  |                                                                                                                                                                                                                                                                                                                                          |
|--------------------------------------------|------------------------------------------------------------------------------------------------------------------------------------------------------------------------------------------------------------------------------------------------------------------|------------------------------------------------------------------------------------------------------------------------------------------------------------------------------------------------------------------------------------------------------------------------------------------------------------------------------------------|
| <p><u>Reporting and Interpretation</u></p> | <p>Demographic description of study population</p> <p>Graphic displays of comparison values, scatter plots</p> <p>Summary statistics and test results</p> <p>Evaluation including quality of data</p> <p>Statistical significance versus clinical importance</p> | <p>Description of all studies reviewed</p> <p>Details of studies analyzed, including results, quality scores</p> <p>Graphical displays of individual study outcomes</p> <p>Effect size and test results from Meta-analysis</p> <p>Evaluation including quality of studies</p> <p>Statistical significance versus clinical importance</p> |
|--------------------------------------------|------------------------------------------------------------------------------------------------------------------------------------------------------------------------------------------------------------------------------------------------------------------|------------------------------------------------------------------------------------------------------------------------------------------------------------------------------------------------------------------------------------------------------------------------------------------------------------------------------------------|
