# Supplementary material
Source: PubMed Central journal article supplement (PMC122061)
Supplement: 1471-2288-2-10-S3.pdf [file 1471-2288-2-10-S3.pdf]

TABLE 3

Topic: \_\_\_\_\_ Reviewer: \_\_\_\_\_ Date: \_\_\_\_\_  
 Study Title: \_\_\_\_\_  
 Authors: \_\_\_\_\_  
 Journal Ref \_\_\_\_\_  
 Other Sources: \_\_\_\_\_  
 Design: \_\_\_\_\_  
 # Treatment Groups: \_\_\_\_\_ Controls? \_\_\_\_\_ Blinded? \_\_\_\_\_

| <u>BASICS</u>                    | <u>GROUP1</u>  | <u>GROUP 2</u> |
|----------------------------------|----------------|----------------|
| N to start                       |                |                |
| Treatment                        |                |                |
| Dose                             |                |                |
| Age of patients                  |                |                |
| Gender M/F                       |                |                |
| Diagnoses                        |                |                |
| Other meds:                      |                |                |
| <u>RESULTS</u>                   | <u>GROUP 1</u> | <u>GROUP 2</u> |
| Length of Treatment              |                |                |
| <u>Outcome 1:</u>                |                |                |
| Mean                             |                |                |
| Std                              |                |                |
| N                                |                |                |
| Test Statistic: Value<br>P Value |                |                |
| <u>Outcome 2 :</u>               |                |                |
| Proportion                       |                |                |
| N                                |                |                |
| Test statistic: Value<br>P value |                |                |
