# Supplementary material
Source: PubMed Central journal article supplement (PMC122061)
Supplement: 1471-2288-2-10-S4.pdf [file 1471-2288-2-10-S4.pdf]

Table 4. Summary of Examples -- Part 1

|                                               | 1. Maximum Androgen Blockade in Advanced Prostate Cancer [38]                                                                          | 2. Glucosamine and Chondroitin for Treatment of Osteoarthritis [39]                                                                        | 3. Ischemic Stroke Risk with Oral Contraceptives [17]                                                                                                                                                                  | 4. Research Design Effects on the Association of Testosterone and Aging [26]                                                                                              |
|-----------------------------------------------|----------------------------------------------------------------------------------------------------------------------------------------|--------------------------------------------------------------------------------------------------------------------------------------------|------------------------------------------------------------------------------------------------------------------------------------------------------------------------------------------------------------------------|---------------------------------------------------------------------------------------------------------------------------------------------------------------------------|
| Study Objective                               | Estimate effect of treatment on survival                                                                                               | Estimate effect of treatment on pain and disability scores                                                                                 | Estimate relative risk of stroke in subjects taking oral contraceptives                                                                                                                                                | Explaining variability between studies                                                                                                                                    |
| Stated Inclusion Criteria Design<br><br>Other | RCT's only<br><br>Trials of NSAA plus either LHRH or orchidectomy vs LHRH or orchidectomy alone<br>Must report usable data             | Placebo-controlled RCT's only<br>Double-blinded<br>Four weeks or more in duration<br><br>Must report usable data                           | Cohort and case-control studies<br>More than 10 stroke cases<br>Clear stroke subtype differentiation<br><br>Adequate data to compute relative risk<br><br>Analysis controlled for age<br><br>Latest report for a study | All types<br><br><br>Mean and standard deviation for plasma or serum T<br>Mean T level by age group and / or correlation with age<br>Latest study used in multiple papers |
| <u>Locating Studies</u>                       | Medline search<br>CancerLit<br>Current Contents<br><br>Review articles<br>Bibliographies of articles<br><br>Contact with investigators | Medline search<br>Cochrane Controlled Trials Register<br><br>Bibliographies of articles<br>Meeting Abstracts<br>Contact with investigators | Medline search<br>BIOSIS<br>Dissertation abstracts online<br>Review articles<br>Bibliographies of articles<br><br>Expert consultation                                                                                  | Medline search<br><br><br>Review articles<br>Bibliographies of articles<br><br>Authors contacted                                                                          |

Table 4. Summary of Examples -- Part 2

|                              | 1. Maximum Androgen Blockade in Advanced Prostate Cancer [38]                                                                 | 2. Glucosamine and Chondroitin for Treatment of Osteoarthritis [39]                                         | 3. Ischemic Stroke Risk with Oral Contraceptives [17]                                          | 4. Research Design Effects on the Association of Testosterone and Aging [26] |
|------------------------------|-------------------------------------------------------------------------------------------------------------------------------|-------------------------------------------------------------------------------------------------------------|------------------------------------------------------------------------------------------------|------------------------------------------------------------------------------|
| <u>Blinding</u>              | Yes                                                                                                                           | Not mentioned                                                                                               | Not mentioned                                                                                  | No for selection of studies<br>Yes for quality score of laboratory methods   |
| <u>Screening</u>             | Selection validated by two independent reviewers                                                                              | No details                                                                                                  | Two investigators applied inclusion criteria<br>A third investigator adjudicated disagreements | No details                                                                   |
| <u>Evaluation</u>            | Quality score using Chalmers criteria                                                                                         | Quality score using Chalmers criteria<br>Two reviewers, consensus not required                              | None described                                                                                 | Developed quality score for laboratory methods                               |
| <u>Number of Studies</u>     |                                                                                                                               |                                                                                                             |                                                                                                |                                                                              |
| Identified                   | 1941                                                                                                                          | 37                                                                                                          | 804                                                                                            | Not given                                                                    |
| Passed first screen          | 76                                                                                                                            | 17                                                                                                          | 73                                                                                             | 88                                                                           |
| Retained                     | 13                                                                                                                            | 15                                                                                                          | 16                                                                                             | 54                                                                           |
| <u>Use of Quality Scores</u> | Displayed for individual studies<br>Effect of quality score tested using categories (top and bottom quartiles; middle fifths) | Displayed for individual studies<br>Effect of quality score tested using categories based on a median split | None described                                                                                 | Descriptive information only                                                 |
| <u>Data Collection</u>       | Two blinded reviewers, differences resolved in conference                                                                     | Two reviewers using a standardized form<br><br>Imputed SD's for 4 trials                                    | Two investigators abstracted data, disagreements resolved through discussion                   | Two coders, differences resolves in conference                               |

Table 4. Summary of Examples -- Part 3

|                      | 1. Maximum Androgen Blockade in Advanced Prostate Cancer [38]                                                             | 2. Glucosamine and Chondroitin for Treatment of Osteoarthritis [39]                                                | 3. Ischemic Stroke Risk with Oral Contraceptives [17]                                                                                                                                                                                   | 4. Research Design Effects on the Association of Testosterone and Aging [26]                                                                                                                        |
|----------------------|---------------------------------------------------------------------------------------------------------------------------|--------------------------------------------------------------------------------------------------------------------|-----------------------------------------------------------------------------------------------------------------------------------------------------------------------------------------------------------------------------------------|-----------------------------------------------------------------------------------------------------------------------------------------------------------------------------------------------------|
| <u>Data Analysis</u> | Estimates of survival statistics and standard errors<br><br>Random effects model                                          | Effect size based on difference in mean score for pain and disability<br><br>Random effects model                  | Summary estimates of risk ratios<br><br>Random effects model                                                                                                                                                                            | Comparison of testosterone-age relationships within different populations<br>Model development                                                                                                      |
| <u>Reporting</u>     | Characteristics of studies included<br>Plots of estimates of survival distributions<br><br>Plots of estimated odds ratios | Characteristics of studies included<br>Plots of effect size<br><br><br>Funnel plots of effect size vs. sample size | Characteristics of studies included<br>Overall relative risk (RR) estimates<br><br>RR and confidence intervals by study<br>Plots of RR stratified by design features<br><br>Funnel plots of RR vs number of cases of stroke and by year | Characteristics of studies included<br>Plots of regression lines for different groupings of patients or sampling times<br><br>Plots of mean T for different subgroups, methods or timing of samples |
